# Supplementary material for: Population-Based Study of the Changes in the Food Choice Determinants of Secondary School Students: Polish Adolescents’ COVID-19 Experience (PLACE-19) Study
Source: Nutrients. 2020 Aug 30;12(9):2640. doi: 10.3390/nu12092640 (PMC7551462; doi:10.3390/nu12092640)
Supplement: Supplementary file 1 [file nutrients-12-02640-s001.pdf]

Supplementary Material

# Population-Based Study of the Changes in the Food Choice Determinants of Secondary School Students: Polish Adolescents' COVID-19 Experience (PLACE-19) Study

Dominika Głabska <sup>1,\*</sup>, Dominika Skolmowska <sup>1</sup>, and Dominika Guzek <sup>2</sup>

<sup>1</sup> Department of Dietetics, Institute of Human Nutrition Sciences, Warsaw University of Life Sciences (SGGW-WULS), 159C Nowoursynowska Street, 02-776 Warsaw, Poland; dominika\_skolmowska@sggw.pl (D.S.)

<sup>2</sup> Department of Food Market and Consumer Research, Institute of Human Nutrition Sciences, Warsaw University of Life Sciences (SGGW-WULS), 159C Nowoursynowska Street, 02-776 Warsaw, Poland; dominika\_guzek@sggw.pl (D.Gu.)

\* Correspondence: dominika\_glabska@sggw.pl (D.Gl.); Tel.: +48-22-593-71-34

**Supplementary Table S1.** The results for the items included within the Factor – Health of the applied Food Choice Questionnaire (FCQ) for the period before and during the COVID-19 pandemic for the sample of adolescents studied within the PLACE-19 Study (n = 2448).

| Items included within Factor – Health     | Before the COVID-19 pandemic |           | During the COVID-19 pandemic |           | <i>p</i> | <i>r</i> |
|-------------------------------------------|------------------------------|-----------|------------------------------|-----------|----------|----------|
|                                           | Median (IQR)                 | 25th-75th | Median (IQR)                 | 25th-75th |          |          |
| Is high in fiber and roughage             | 2.0 (1.0)                    | 2.0-3.0   | 2.0 (1.0)                    | 2.0-3.0   | < 0.0001 | 0.26     |
| Is nutritious                             | 3.0 (2.0)                    | 2.0-4.0   | 3.0 (2.0)                    | 2.0-4.0   | 0.0023   | 0.11     |
| Contains a lot of vitamins and minerals   | 3.0 (2.0)                    | 2.0-4.0   | 3.0 (2.0)                    | 2.0-4.0   | 0.0034   | 0.10     |
| Is high in protein                        | 3.0 (1.0)                    | 2.0-3.0   | 3.0 (2.0)                    | 2.0-4.0   | 0.0051   | 0.11     |
| Keeps me healthy                          | 3.0 (2.0)                    | 2.0-4.0   | 3.0 (2.0)                    | 2.0-4.0   | 0.0970   | 0.06     |
| Is good for my skin/teeth/hair/nails etc. | 3.0 (2.0)                    | 2.0-4.0   | 3.0 (2.0)                    | 2.0-4.0   | 0.0064   | 0.11     |

IQR – interquartile range.

**Supplementary Table S2.** The results for the items included within the Factor – Mood of the applied Food Choice Questionnaire (FCQ) for the period before and during the COVID-19 pandemic for the sample of adolescents studied within the PLACE-19 Study (n = 2448).

| Items included within Factor – Mood | Before the COVID-19 pandemic |           | During the COVID-19 pandemic |           | <i>p</i> | <i>r</i> |
|-------------------------------------|------------------------------|-----------|------------------------------|-----------|----------|----------|
|                                     | Median (IQR)                 | 25th-75th | Median (IQR)                 | 25th-75th |          |          |
| Makes me feel good                  | 4.0 (1.0)                    | 3.0-4.0   | 3.0 (2.0)                    | 2.0-4.0   | < 0.0001 | 0.60     |
| Helps me cope with stress           | 2.0 (2.0)                    | 1.0-3.0   | 2.0 (2.0)                    | 1.0-3.0   | 0.0001   | 0.13     |
| Keeps me awake/alert                | 3.0 (1.0)                    | 2.0-3.0   | 3.0 (2.0)                    | 2.0-4.0   | 0.2853   | 0.04     |
| Helps me relax                      | 3.0 (1.0)                    | 2.0-3.0   | 2.0 (1.0)                    | 2.0-3.0   | 0.1012   | 0.05     |
| Cheers me up                        | 3.0 (2.0)                    | 2.0-4.0   | 3.0 (2.0)                    | 2.0-4.0   | < 0.0001 | 0.28     |
| Helps me to cope with life          | 2.0 (2.0)                    | 1.0-3.0   | 2.0 (2.0)                    | 1.0-3.0   | < 0.0001 | 0.15     |

IQR – interquartile range.

**Supplementary Table S3.** The results for the items included within the Factor – Convenience of the applied Food Choice Questionnaire (FCQ) for the period before and during the COVID-19 pandemic for the sample of adolescents studied within the PLACE-19 Study (n = 2448).

| Items included within Factor – Convenience           | Before the COVID-19 pandemic |           | During the COVID-19 pandemic |           | <i>p</i> | <i>r</i> |
|------------------------------------------------------|------------------------------|-----------|------------------------------|-----------|----------|----------|
|                                                      | Median (IQR)                 | 25th-75th | Median (IQR)                 | 25th-75th |          |          |
| Is easy to prepare                                   | 2.0 (1.0)                    | 2.0-3.0   | 3.0 (1.0)                    | 2.0-3.0   | < 0.0001 | 0.13     |
| Is easily available in shops and supermarkets        | 3.0 (2.0)                    | 2.0-4.0   | 3.0 (2.0)                    | 2.0-4.0   | 0.9026   | 0.00     |
| Takes no time to prepare                             | 3.0 (2.0)                    | 2.0-4.0   | 3.0 (2.0)                    | 2.0-4.0   | 0.0002   | 0.12     |
| Can be cooked very simply                            | 3.0 (2.0)                    | 2.0-4.0   | 3.0 (2.0)                    | 2.0-4.0   | 0.1624   | 0.05     |
| Can be bought in shops close to where I live or work | 3.0 (2.0)                    | 2.0-4.0   | 3.0 (2.0)                    | 2.0-4.0   | < 0.0001 | 0.16     |

IQR – interquartile range.

**Supplementary Table S4.** The results for the items included within the Factor – Sensory Appeal of the applied Food Choice Questionnaire (FCQ) for the period before and during the COVID-19 pandemic for the sample of adolescents studied within the PLACE-19 Study (n = 2448).

| Items included within Factor – Sensory Appeal | Before the COVID-19 pandemic |           | During the COVID-19 pandemic |           | <i>p</i> | <i>r</i> |
|-----------------------------------------------|------------------------------|-----------|------------------------------|-----------|----------|----------|
|                                               | Median (IQR)                 | 25th-75th | Median (IQR)                 | 25th-75th |          |          |
| Tastes good                                   | 4.0 (1.0)                    | 3.0-4.0   | 4.0 (1.0)                    | 3.0-4.0   | < 0.0001 | 0.51     |
| Smells nice                                   | 3.0 (1.0)                    | 3.0-4.0   | 3.0 (2.0)                    | 2.0-4.0   | < 0.0001 | 0.28     |
| Has a pleasant texture                        | 3.0 (1.0)                    | 2.0-3.0   | 2.0 (1.0)                    | 2.0-3.0   | 0.6345   | 0.02     |
| Looks nice                                    | 3.0 (2.0)                    | 2.0-4.0   | 3.0 (2.0)                    | 2.0-4.0   | < 0.0001 | 0.15     |

IQR – interquartile range.

**Supplementary Table S5.** The results for the items included within the Factor – Natural Content of the applied Food Choice Questionnaire (FCQ) for the period before and during the COVID-19 pandemic for the sample of adolescents studied within the PLACE-19 Study (n = 2448).

| Items included within Factor – Natural Content | Before the COVID-19 pandemic |           | During the COVID-19 pandemic |           | <i>p</i> | <i>r</i> |
|------------------------------------------------|------------------------------|-----------|------------------------------|-----------|----------|----------|
|                                                | Median (IQR)                 | 25th-75th | Median (IQR)                 | 25th-75th |          |          |
| Contains no additives                          | 2.0 (2.0)                    | 1.0-3.0   | 2.0 (2.0)                    | 1.0-3.0   | < 0.0001 | 0.20     |
| Contains natural ingredients                   | 1.0 (1.0)                    | 1.0-2.0   | 3.0 (2.0)                    | 2.0-4.0   | 0.1709   | 0.05     |
| Contains no artificial ingredients             | 2.0 (2.0)                    | 1.0-3.0   | 3.0 (2.0)                    | 2.0-4.0   | 0.5096   | 0.02     |

IQR – interquartile range.

**Supplementary Table S6.** The results for the items included within the Factor – Price of the applied Food Choice Questionnaire (FCQ) for the period before and during the COVID-19 pandemic for the sample of adolescents studied within the PLACE-19 Study (n = 2448).

| Items included within Factor – Price | Before the COVID-19 pandemic |           | During the COVID-19 pandemic |           | <i>p</i> | <i>r</i> |
|--------------------------------------|------------------------------|-----------|------------------------------|-----------|----------|----------|
|                                      | Median (IQR)                 | 25th-75th | Median (IQR)                 | 25th-75th |          |          |
| Is not expensive                     | 3.0 (1.0)                    | 2.0-3.0   | 3.0 (2.0)                    | 2.0-4.0   | 0.0007   | 0.11     |
| Is good value for money              | 3.0 (2.0)                    | 2.0-4.0   | 3.0 (2.0)                    | 2.0-4.0   | < 0.0001 | 0.15     |
| Is cheap                             | 3.0 (1.0)                    | 2.0-3.0   | 3.0 (2.0)                    | 2.0-4.0   | < 0.0001 | 0.18     |

IQR – interquartile range.

**Supplementary Table S7.** The results for the items included within the Factor – Weight Control of the applied Food Choice Questionnaire (FCQ) for the period before and during the COVID-19 pandemic for the sample of adolescents studied within the PLACE-19 Study (n = 2448).

| Items included within Factor – Weight Control | Before the COVID-19 pandemic |           | During the COVID-19 pandemic |           | <i>p</i> | <i>r</i> |
|-----------------------------------------------|------------------------------|-----------|------------------------------|-----------|----------|----------|
|                                               | Median (IQR)                 | 25th-75th | Median (IQR)                 | 25th-75th |          |          |
| Is low in calories                            | 2.0 (2.0)                    | 1.0-3.0   | 2.0 (2.0)                    | 1.0-3.0   | < 0.0001 | 0.33     |
| Is low in fat                                 | 2.0 (1.0)                    | 2.0-3.0   | 3.0 (1.0)                    | 2.0-3.0   | < 0.0001 | 0.14     |
| Helps me control my weight                    | 3.0 (2.0)                    | 2.0-4.0   | 3.0 (2.0)                    | 2.0-4.0   | 0.0001   | 0.15     |

IQR – interquartile range.

**Supplementary Table S8.** The results for the items included within the Factor – Familiarity of the applied Food Choice Questionnaire (FCQ) for the period before and during the COVID-19 pandemic for the sample of adolescents studied within the PLACE-19 Study (n = 2448).

| Items included within Factor – Familiarity | Before the COVID-19 pandemic |           | During the COVID-19 pandemic |           | <i>p</i> | <i>r</i> |
|--------------------------------------------|------------------------------|-----------|------------------------------|-----------|----------|----------|
|                                            | Median (IQR)                 | 25th-75th | Median (IQR)                 | 25th-75th |          |          |
| Is familiar                                | 3.0 (1.0)                    | 2.0-3.0   | 3.0 (1.0)                    | 2.0-3.0   | 0.6333   | 0.01     |
| Is like the food I ate when I was a child  | 2.0 (2.0)                    | 1.0-3.0   | 2.0 (2.0)                    | 1.0-3.0   | 0.0086   | 0.09     |
| Is what I usually eat                      | 2.0 (1.0)                    | 2.0-3.0   | 2.0 (1.0)                    | 2.0-3.0   | 0.5495   | 0.02     |

IQR – interquartile range.

**Supplementary Table S9.** The results for the items included within the Factor – Ethical Concern of the applied Food Choice Questionnaire (FCQ) for the period before and during the COVID-19 pandemic for the sample of adolescents studied within the PLACE-19 Study (n = 2448).

| Items included within<br>Factor – Ethical Concern | Before the COVID-19 pandemic |           | During the COVID-19 pandemic |           | <i>p</i> | <i>r</i> |
|---------------------------------------------------|------------------------------|-----------|------------------------------|-----------|----------|----------|
|                                                   | Median (IQR)                 | 25th-75th | Median (IQR)                 | 25th-75th |          |          |
| Is packaged in an environmentally friendly way    | 2.0 (2.0)                    | 1.0-3.0   | 2.0 (2.0)                    | 1.0-3.0   | 0.2710   | 0.04     |
| Comes from countries I approve of politically     | 1.0 (1.0)                    | 1.0-2.0   | 2.0 (2.0))                   | 1.0-3.0   | < 0.0001 | 0.31     |
| Has the country of origin clearly marked          | 2.0 (2.0)                    | 1.0-3.0   | 2.0 (2.0)                    | 1.0-3.0   | 0.2595   | 0.04     |

IQR – interquartile range.

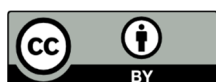

© 2020 by the authors. Licensee MDPI, Basel, Switzerland. This article is an open access article distributed under the terms and conditions of the Creative Commons Attribution (CC BY) license (<http://creativecommons.org/licenses/by/4.0/>).
